# Supplementary material for: Changes in Inflammatory Markers in Patients with Chronic Thromboembolic Pulmonary Hypertension Treated with Balloon Pulmonary Angioplasty
Source: MDPI journal article supplement (doi:10.3390/cells11091491), 2022-04-29
Supplement: s1 [file s1]

### Supplementary Tables:

Table S1. Serum concentrations of biomarkers at four specified time-points in the CTEPH patients.

|       | Before single BPA   | 24 hours after BPA  | Baseline            | 6 months after treatment | p <sup>a</sup> | p <sup>b</sup> |
|-------|---------------------|---------------------|---------------------|--------------------------|----------------|----------------|
| ET-1  | 2.35 [2.18-3.32]    | 2.2 [1.9-2.86]      | 2.68 [2.24-3.64]    | 2.22 [1.8-3.05]          | 0.20           | 0.005          |
| MCP-1 | 432.6 [354.9-482.6] | 561.5 [459.5-663.9] | 418.7 [338.2-506.1] | 429.9 [372.9-508.7]      | 0.001          | 0.99           |
| IL-6  | 3.53 [2.26-4.99]    | 8.63 [5.69-11.43]   | 3.82 [2.96-6.03]    | 2.02 [1.47-5.78]         | <0.001         | 0.03           |
| IL-8  | 18.29 [15.07-25.62] | 19.63 [17.18-35.82] | 17.96 [14.23-25.62] | 17.04 [13.12-21.79]      | 0.91           | 0.01           |
| IL-10 | 0.48 [0.39-0.58]    | 0.79 [0.63-1.45]    | 0.49 [0.39-0.58]    | 0.58 [0.32-0.77]         | 0.003          | 0.50           |
| hsCRP | 1.69 [0.71-3.85]    | 7.73 [4.9-12.6]     | 2.16 [0.75-4.48]    | 2.04 [0.82-2.92]         | <0.001         | 0.28           |

CTEPH, chronic thromboembolic pulmonary hypertension; ET-1, endothelin 1; hsCRP, high sensitivity C-reactive protein; IL-6, interleukin 6; IL-8, interleukin 8; IL-10, interleukin 10; MCP-1, monocyte chemoattractant protein 1

<sup>a</sup> – before vs after single BPA; <sup>b</sup> – before and after completion of the treatment

Table S2. Comparison of serum concentration of selected biomarkers between treatment naïve patients with CTEPH, patients with CTEPH on treatment and control group.

|       | CTEPH (n=9)<br>treatment naïve | CTEPH (n=11)<br>on treatment | Controls (n=10)     | p*   | p#   |
|-------|--------------------------------|------------------------------|---------------------|------|------|
| hsCRP | 1.46 [0.71-3.7]                | 2.4 [0.79-7.33]              | 2.15 [0.88-2.77]    | 0.44 | 0.87 |
| IL-6  | 4.79 [3.55-5.51]               | 3.76 [2.42-6.55]             | 1.81 [0.88-4.48]    | 0.57 | 0.03 |
| IL-8  | 15.23 [13.55-19.1]             | 22.19 [14.43-42.88]          | 13.45 [12.46-16.02] | 0.16 | 0.46 |
| IL-10 | 0.51 [0.4-0.84]                | 0.53 [0.44-0.58]             | 0.51 [0.48-0.69]    | 0.75 | 0.79 |
| MCP-1 | 445 [339-487]                  | 417 [337-525]                | 416 [273-505]       | 0.79 | 0.83 |
| ET-1  | 2.77 [1.7-3.49]                | 2.6 [2.31-3.81]              | 1.47 [1.4-1.82]     | 0.38 | 0.03 |

CTEPH, chronic thromboembolic pulmonary hypertension; ET-1, endothelin 1; hsCRP, high sensitivity C-reactive protein; IL-6, interleukin 6; IL-8, interleukin 8; IL-10, interleukin 10; MCP-1, monocyte chemoattractant protein 1

\* - treatment naïve vs. on treatment; #- treatment naïve vs. controls
